# Supplementary material
Source: publisher site journal article supplement (https://www.dovepress.com/get_supplementary_file.php?f=497053.docx)
Supplement: Supplementary file 1 [file get_supplementary_file.php]

**Use of a Kiosk-Model Self-Triage System for COVID-19 Triage**

**Online Supplement**

**Table S1** Survey questions on COVID-19 infection based on the national and international guidelines1

|  | **Details / Response Options** | **SKT** | **RT** |
| --- | --- | --- | --- |
| What is the examination date? | Date (Day/Month/Year) | Data stored in the kiosk server | Data manually recorded by the HCP |
| What is your name and surname? | Name and surname | Data stored in the kiosk server | Data manually recorded by the HCP |
| What is your age? | Age in years | Data stored in the kiosk server | Data manually recorded by the HCP |
| What is your biological gender? | Male / Female | Data stored in the kiosk server | Data manually recorded by the HCP |
| What is your identity number or hospital admission number? | ID number | Data stored in the kiosk server | Data manually recorded by the HCP |
| What is your educational level? | Primary school / High school / University | Data stored in the kiosk server | Data manually recorded by the HCP |
| Please note if you have any of the medical conditions below | Chronic heart disease / Hypertension / Diabetes mellitus / Chronic obstructive pulmonary disease / Asthma / Cancer / Chronic renal failure / Chronic liver failure or cirrhosis / Immunosuppressive treatment / HIV, AIDS / Pregnancy or the possibility of pregnancy / None of the above | Data stored in the kiosk server | Data manually recorded by the HCP |
| Did you have a fever in the last 14 days? | Yes / No | Data stored in the kiosk server | Data manually recorded by the HCP |
| Did you have a cough in the last 14 days? | Yes / No | Data stored in the kiosk server | Data manually recorded by the HCP |
| Did you have difficulty breathing or respiratory distress in the last 14 days? | Yes / No | Data stored in the kiosk server | Data manually recorded by the HCP |
| Did you have a runny nose in the last 14 days? | Yes / No | Data stored in the kiosk server | Data manually recorded by the HCP |
| Have you been abroad in the last 14 days? | Yes / No | Data stored in the kiosk server | Data manually recorded by the HCP |
| Has anyone in your household been abroad in the last 14 days? | Yes / No | Data stored in the kiosk server | Data manually recorded by the HCP |
| In the last 14 days, have anyone in your family hospitalized with a diagnosis of respiratory disease? | Yes / No | Data stored in the kiosk server | Data manually recorded by the HCP |
| Has anyone in your family been diagnosed with COVID-19 in the last 14 days? | Yes / No | Data stored in the kiosk server | Data manually recorded by the HCP |
| Please note if you had any of the complaints listed below in the last 14 days. | Pain in the joints / Headache / Chest pain / Fatigue / Sore throat / Cyanosis in the lips / Redness in the eyes / New onset loss of taste / New onset loss of smell / New onset diarrhea, nausea, and abdominal pain / New onset skin rash | Data stored in the kiosk server | Data manually recorded by the HCP |
| Oxygen saturation measured by pulse oximetry, % | Value, % | Self-measurement in the kiosk and data stored in the kiosk server | Measured and manually recorded by the HCP |
| Body temperature measured thermometry, °C | Value, °C | Self-measurement in the kiosk and data stored in the kiosk server | Measured and manually recorded by the HCP |
| The total duration in ED | Duration, in minutes | Data stored in the kiosk server | Data manually recorded by the HCP |
| The number of healthcare workers/medical staff contacted in the ED | The number of healthcare workers | Data manually recorded by the HCP | Data manually recorded by the HCP |

Definitions of abbreviations: SKT: self-kiosk triage, RT: routine triage, HCP: health-care provider, ED: emergency department

**Table S2** Description of the software, data transfer, functionality, hardware and data storage method used in the self-triage kiosk used in this study

| **Category** | **Description and details** |
| --- | --- |
| Software | Net Core 2.2 was used for backend operation and integrations between the backend and temperature measurement hardware. |
|  | Node.js was used for between the backend and oximeter measurement hardware integrations.**.** |
|  | Vue.js was used for frontend touchscreen development |
| Data transfer | LAN Ethernet used for communication between the backend and database, as well as between backend and temperature measurement hardware |
|  | RS-232 used for communication between the backend, frontend, and oximeter measurement hardware. |
| Functionality/Hardware | Web-based SPA provides the touch screen interface. |
|  | User interface flow: |
|  | 1. Login screen OTP authentication required for access. |
|  | 1. Measurement screen: Users are guided through temperature and oximeter measurements. |
|  | 1. Results Screen: Displays real-time measurement data from both the temperature sensor and oximeter. |
|  | 1. Confirmation Screen: Allows users to confirm or reject the measurements, followed by saving or proceeding with the next session. |
| Data Storage | Data is stored in the MSSQL database. |
|  | Local storage is used only during temporary operation session . |

Definitions of abbreviations: LAN: Local Area Network; RS-232: Recommended Standard. RS-232 refers to a specific technical standard for serial communication, commonly used for transmitting data between devices like computers, sensors, or measurement hardware, often over short distances; SPA: Single Page Application; OTP: One-Time Password; MSSQL: Microsoft Structured Query Language Server.

**Table S3** Survey questions about how patients perceived the feasibility of the self-kiosk on a 4-point Likert scale

Please choose the response (ranging from *Strongly Disagree* to *Strongly Agree*) that best reflects your opinion for the following statements based on your experience with the self-kiosk triage procedure.

|  | Strongly disagree | Disagree | Agree | Strongly agree |
| --- | --- | --- | --- | --- |
| The instructions provided by the system were clear. |  |  |  |  |
| The system was user-friendly. |  |  |  |  |
| Using the pulse oximeter was easy. |  |  |  |  |
| Using the thermometer was easy. |  |  |  |  |
| The time spent during the SKT procedure was not too long. |  |  |  |  |

**Table S4** Comparison of morning and evening measurements between clinical and kiosk devices for thermometry and oxymetry

| Morning Thermometry, °C | |  | Evening Thermometry, °C | |  | Morning Oximetry, % | |  | Evening Oximetry, % | |  |
| --- | --- | --- | --- | --- | --- | --- | --- | --- | --- | --- | --- |
| Clinical device | Kiosk device | p | Clinical device | Kiosk device | p | Clinical device | Kiosk device | p | Clinical device | Kiosk device | p |
| 36.56 ± 0.63 | 36.54 ± 0.58 | 0.607 | 36.57 ± 0.55 | 36.56 ± 0.51 | 0.650 | 94.84 ± 3.02 | 94.58 ± 2.95 | 0.172 | 93.68 ± 4.45 | 93.79 ± 4.30 | 0.578 |

Data presented in means ± standard deviations. Statistical significance was assessed by using a paired t-test. Morning measurements were performed between 08.00 and 08.30 AM, evening measurements were performed between 08.00 and 08.30 PM.

**References**

1. Ministry of Health RoT. COVID-19. <https://covid19.saglik.gov.tr/Eklenti/39551/0/covid-19rehberigenelbilgilerepidemiyolojivetanipdf.pdf>. Published 2020. Accessed.
